# Supplementary material
Source: publisher figshare collection journal article supplement (https://acs.figshare.com/ndownloader/files/15202892)
Supplement: Supplementary file 1 [file 15202892]

## Supplementary

### **Ti<sub>2</sub>C MXene modified with ceramic oxide and noble metal nanoparticles: synthesis, morpho-structural properties and high photocatalytic activity**

Tomasz Wojciechowski<sup>†</sup>, Anita Rozmysłowska-Wojciechowska<sup>‡</sup>, Grzegorz Matyszczyk<sup>†</sup>, Michał Wrzecionek<sup>†</sup>, Andrzej Olszyna<sup>‡</sup>, Anca Peter<sup>§</sup>, Anca Mihaly-Cozmuta<sup>§</sup>, Camelia Nicula<sup>§</sup>, Leonard Mihaly-Cozmuta<sup>§</sup>, Sławomir Podsiadło<sup>†</sup>, Dariusz Basiak<sup>†</sup>, Wanda Ziemkowska<sup>†\*</sup>, Agnieszka Jastrzębska<sup>‡</sup>

<sup>†</sup> Warsaw University of Technology, Faculty of Chemistry, Noakowskiego 3, 00-664 Warsaw, Poland

<sup>§</sup> Technical University Cluj Napoca, Department of Chemistry and Biology, Victor Babes 76, 0040744790308, Baia Mare, Romania

<sup>‡</sup> Warsaw University of Technology, Faculty of Materials Science and Engineering, Wołoska st. 141, 02-507 Warsaw, Poland

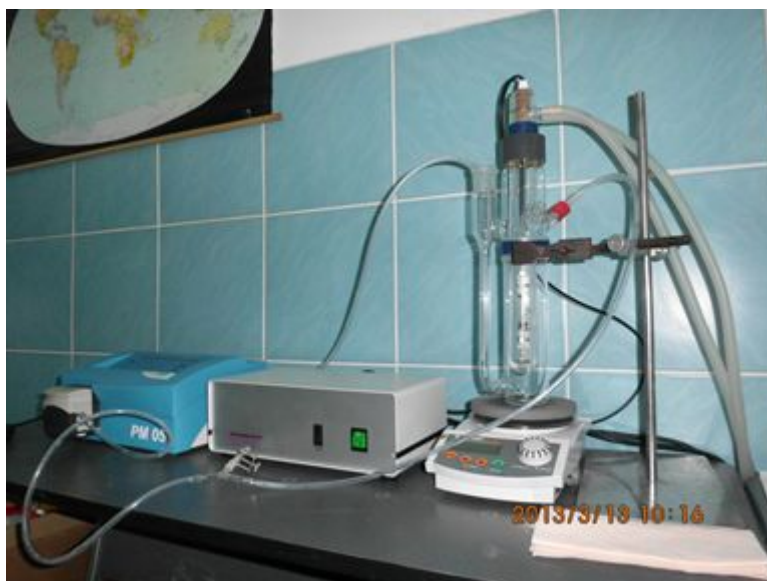

**Figure S1.** UV-reactor system

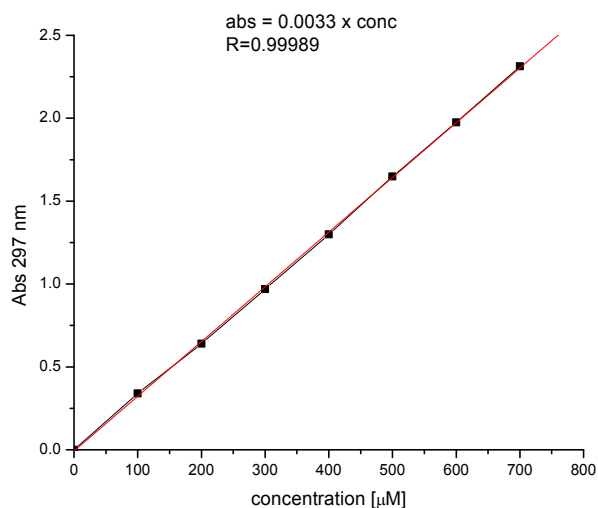

**Figure S2.** Reference curve for salicylic acid

**Table S1.** Values of apparent rate constant and square correlation coefficient

| Run | Samples  | Composition                                               | $k_{app}$ (min <sup>-1</sup> ) | R <sup>2</sup> |
|-----|----------|-----------------------------------------------------------|--------------------------------|----------------|
| 1   | <b>1</b> | Ti <sub>2</sub> C                                         | 0.01331                        | 0.9815         |
| 2   | <b>2</b> | Ti <sub>2</sub> C/3%TiO <sub>2</sub>                      | 0.01431                        | 0.9923         |
| 3   | <b>3</b> | Ti <sub>2</sub> C/3%TiO <sub>2</sub> /1%Ag <sub>2</sub> O | 0.01710                        | 0.9896         |
| 4   | <b>4</b> | Ti <sub>2</sub> C/3%TiO <sub>2</sub> /1%Ag                | 0.01796                        | 0.9633         |
| 5   | <b>5</b> | Ti <sub>2</sub> C/3%TiO <sub>2</sub> /1%PdO               | 0.01078                        | 0.9973         |
| 6   | <b>6</b> | Ti <sub>2</sub> C/3%TiO <sub>2</sub> /1%Pd                | 0.01284                        | 0.9873         |
| 7   | <b>7</b> | Ti <sub>2</sub> C/3%TiO <sub>2</sub> /1%Au                | 0.01460                        | 0.9883         |

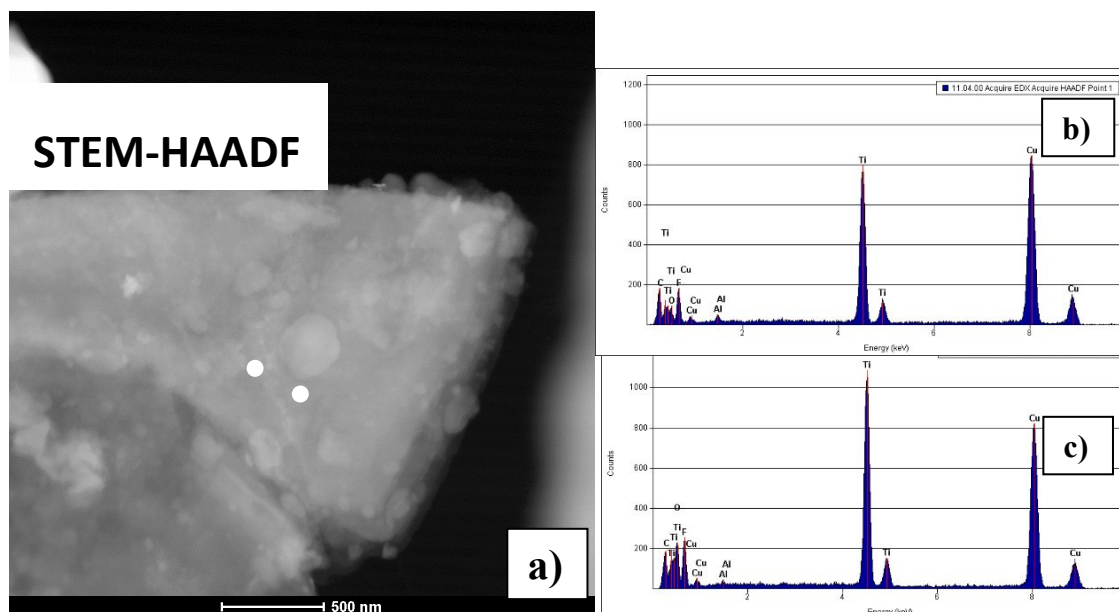

**Figure S3.** Ti<sub>2</sub>C MXene (sample 1) (a) its STEM-HAADF micrograph. (b, c) The EDX analyses in two points i.e. 1 and 2.

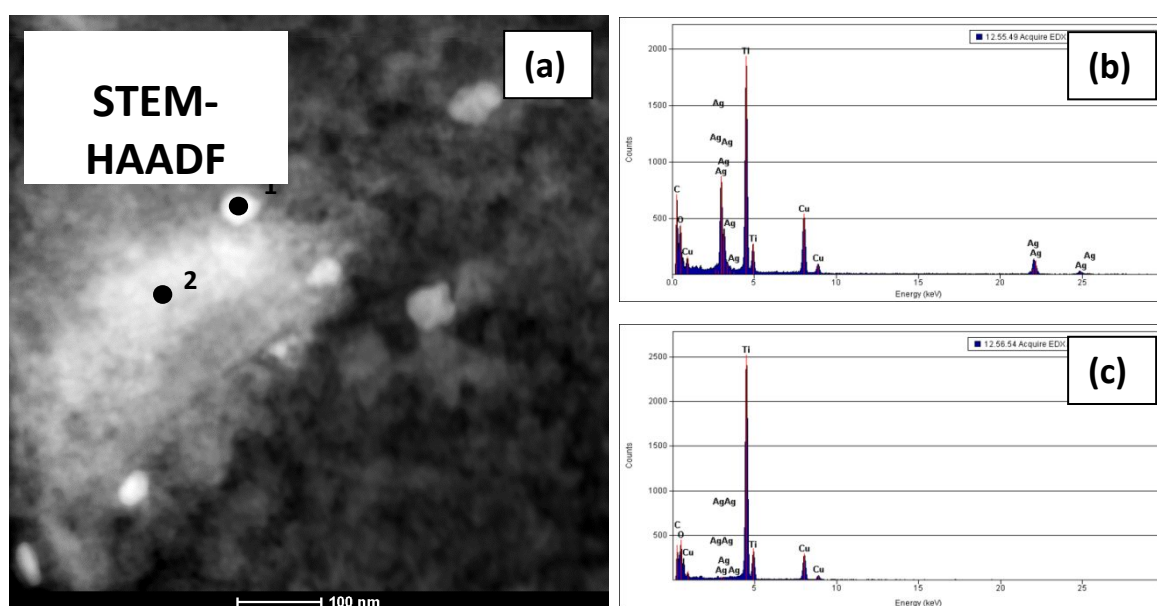

**Figure S4.** The STEM-HAADF image of the Ti<sub>2</sub>C/3%TiO<sub>2</sub>/1%Ag<sub>2</sub>O (3) nanocomposite clearly shows Ag nanoparticles as bright spots (a), which was additionally confirmed with (b, c) EDX analysis in two points.

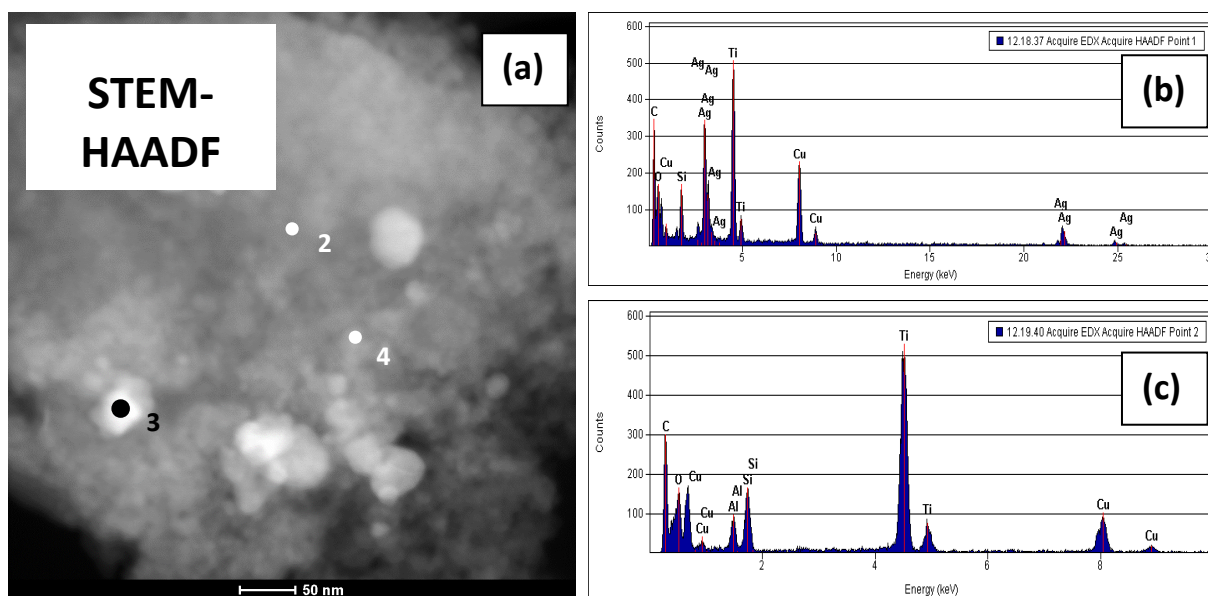

**Figure S5.** (a) The STEM-HAADF image of the sample (4) clearly shows Ag and  $\text{TiO}_2$  nanoparticles as bright spots; (b, c) EDX analysis in two points.

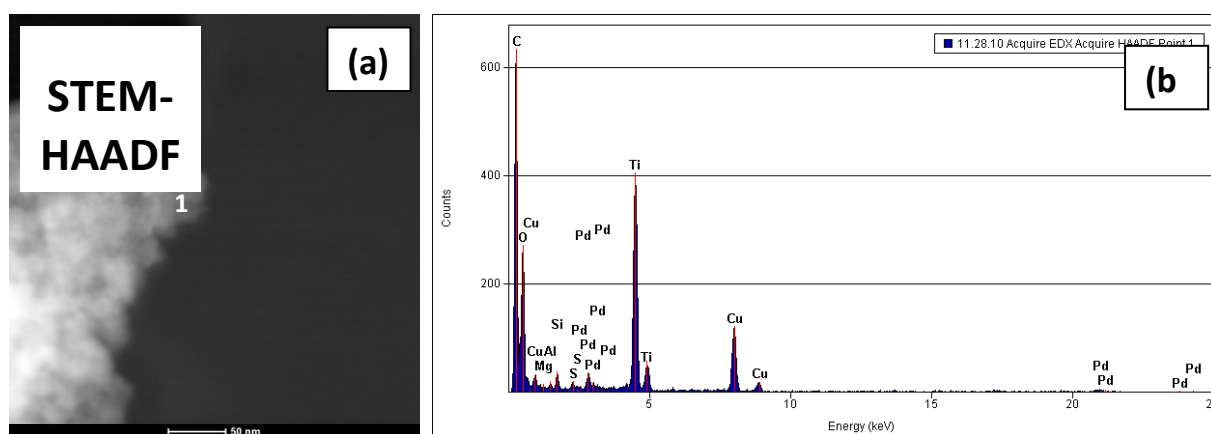

**Figure S6.** (a) The STEM-HAADF analysis of the sample (5) showing the occurrence of palladium on the surface of the  $\text{Ti}_2\text{C}$  flake in the shape of bright points, as confirmed by the EDX analysis (b).

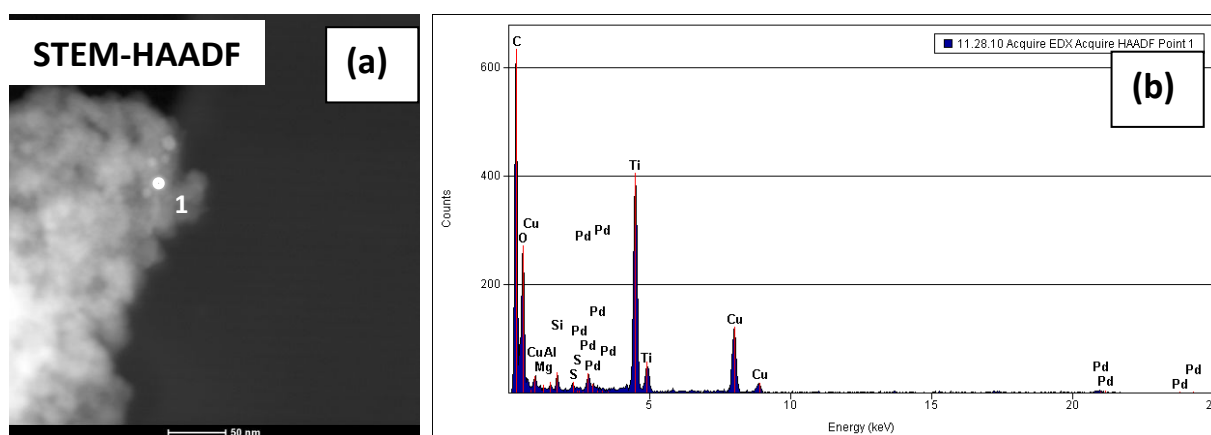

**Figure S7.** (a) The STEM-HAADF image of the sample (6) showing Pd nanoparticles as bright spots. (b) The EDX analysis confirming a presence of palladium;

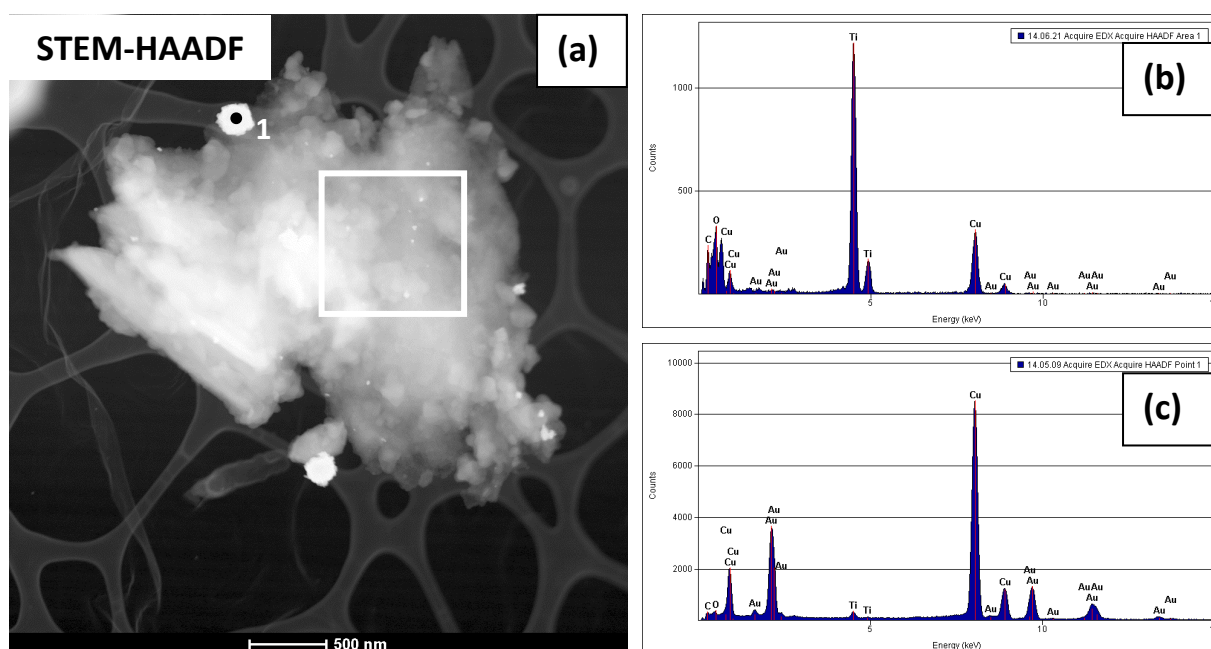

**Figure S8.** (a) STEM-HAADF image showing Au nanoparticles as bright spots in the sample  $\text{Ti}_2\text{C}/3\%\text{TiO}_2/1\%\text{Au}$  (7). (b,c) EDX analysis performed in a selected point of the sample area confirming additionally the presence of gold.

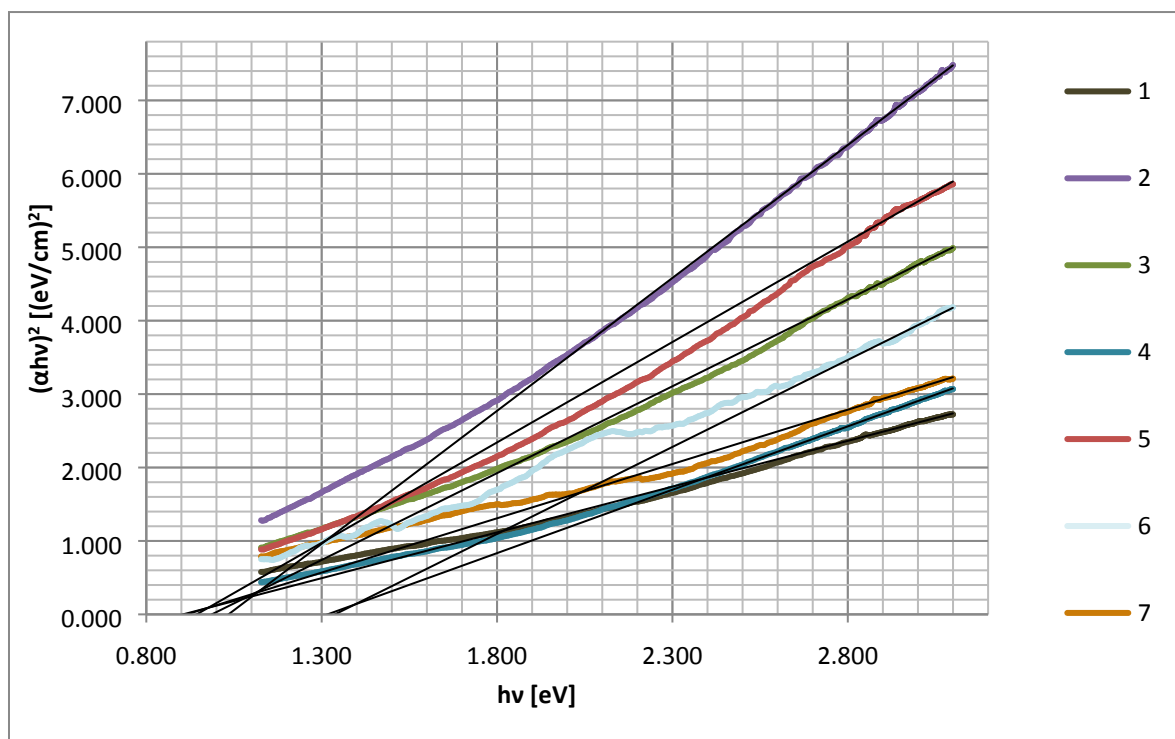

**Figure S9.** Variation of  $(\alpha h\nu)^2$  as a function of photon energy ( $h\nu$ ) for investigated samples.

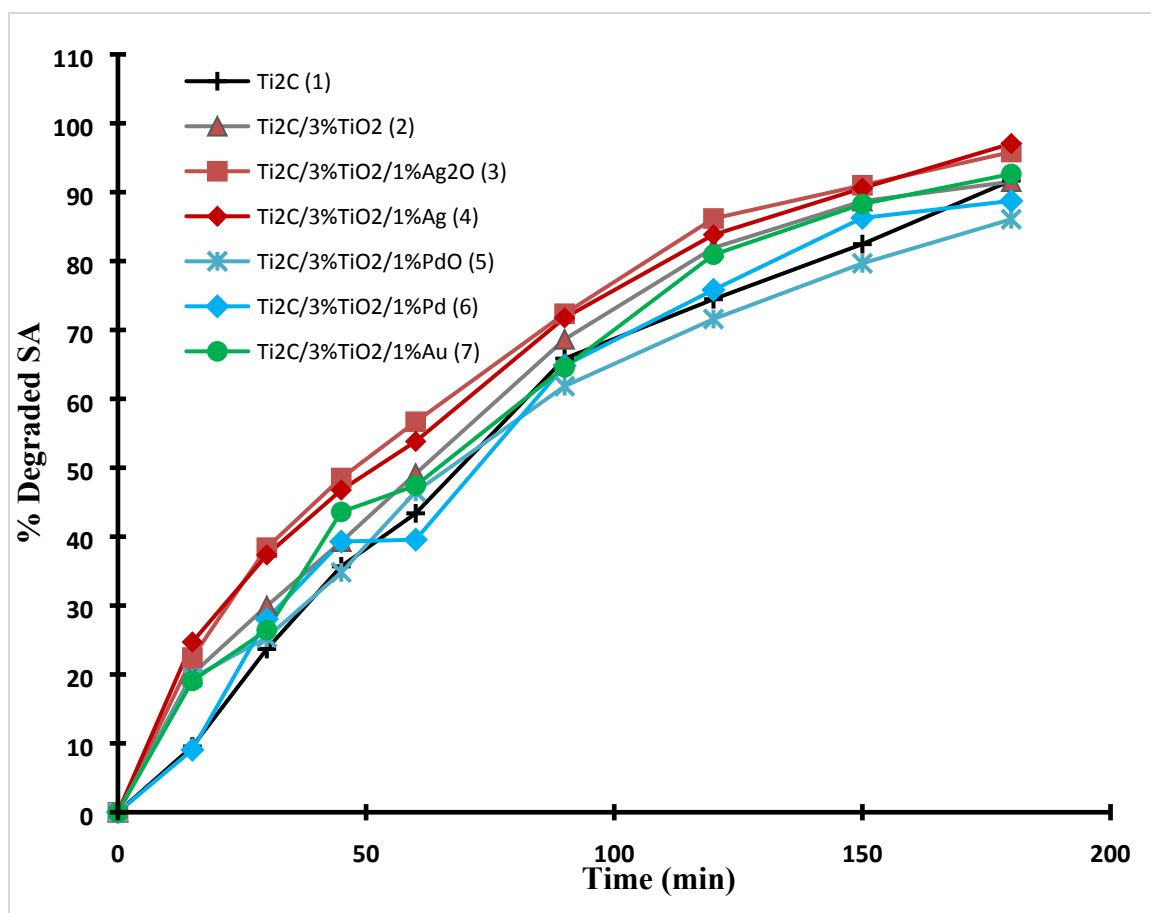

**Figure S10.** Profiles of photodegraded SA on 1-7 nanomaterials – percentage of degraded SA depending on time
